# Supplementary material
Source: MDPI journal article supplement (https://www.mdpi.com/2075-163X/12/9/1159)
Supplement: s1 [file s1]

Archive with 1 entries (1 files):
- minerals-1851185-SI.pdf
